# Supplementary material
Source: MDPI journal article supplement (https://www.mdpi.com/2073-4395/12/12/2914)
Supplement: s1 [file s1]

Table S1: Weed species recorded across surveys

| Common name          | Genus species                                        | Family         | % of fields |
|----------------------|------------------------------------------------------|----------------|-------------|
| Joyweed              | <i>Alternanthera</i> spp.                            | Amaranthaceae  | 0.1         |
| Bathurst burr        | <i>Xanthium spinosum</i> L.                          | Asteraceae     | 0.9         |
| Capeweed             | <i>Arctotheca calendula</i> (L.) Levyns              | Asteraceae     | 1.9         |
| Cotula, Common       | <i>Cotula australis</i> (Siever ex. Spreng) Hook .F. | Asteraceae     | 0.1         |
| Cudweed              | <i>Gnaphalium</i> spp.                               | Asteraceae     | 5.1         |
| Daisy                | <i>Brachycome</i> spp.                               | Asteraceae     | 0.1         |
| Flat weed            | <i>Hypochoeris radicata</i> L.                       | Asteraceae     | 1.0         |
| Fleabane, Flaxleaf   | <i>Conyza bonariensis</i> (L.) Conquist              | Asteraceae }   | 12.4        |
| Fleabane, Tall       | <i>Conyza albida</i> Willd. ex Spreng                | Asteraceae }   |             |
| Ox Tongue            | <i>Picris echiodes</i> L.                            | Asteraceae     | 0.3         |
| Prickly lettuce      | <i>Lactuca serriola</i> L.                           | Asteraceae     | 13.8        |
| Skeleton weed        | <i>Chondrilla juncea</i> L.                          | Asteraceae     | 5.4         |
| Sow thistle          | <i>Sonchus oleraceus</i> L.                          | Asteraceae     | 34.2        |
| Thistle, Saffron     | <i>Carthamus lanatus</i> L.                          | Asteraceae }   | 4.5         |
| Thistle, Scotch      | <i>Onopordum acanthium</i> L.                        | Asteraceae }   |             |
| Thistle, Spear       | <i>Cirsium vulgare</i> (Savi.) Ten.                  | Asteraceae }   |             |
| Thistle, Variegated  | <i>Silybum marianum</i> L.                           | Asteraceae }   |             |
| Amsinckia            | <i>Amsinckia intermedia</i> Fisch & C.A.Meyer        | Boraginaceae   | 0.1         |
| Heliotrope           | <i>Heliotropium europaeum</i> L.                     | Boraginaceae   | 0.5         |
| Paterson's curse     | <i>Echium plantagineum</i> L.                        | Boraginaceae   | 4.5         |
| African turnip weed  | <i>Sisymbrium thellungii</i> O. E. Schulz            | Brassicaceae   | 0.4         |
| Buchan Weed          | <i>Hirschfeldia incana</i> (L.) Lagrèze-Fossat       | Brassicaceae   | 0.8         |
| Indian hedge mustard | <i>Sisymbrium orientale</i> L.                       | Brassicaceae   | 5.4         |
| Peppercress          | <i>Lepidium hyssopifolium</i> Desv.                  | Brassicaceae   | 1.4         |
| Shepherds purse      | <i>Capsella bursa-pastoris</i> (L.) Medik            | Brassicaceae   | 2.6         |
| Turnip weed          | <i>Rapistrum rugosum</i> (L.) All.                   | Brassicaceae   | 0.7         |
| Wild radish          | <i>Raphanus raphanistrum</i> L.                      | Brassicaceae   | 4.2         |
| Wild turnip          | <i>Brassica tournefortii</i> Gouan                   | Brassicaceae   | 5.0         |
| Bluebell             | <i>Wahlenbergia</i> spp.                             | Campanulaceae  | 3.5         |
| Atriplex spp         | <i>Atriplex</i> spp.                                 | Chenopodaceae  | 0.3         |
| Australian Bindweed  | <i>Convolvulus erubescens</i> Sims                   | Convolvulaceae | 0.1         |
| Convolvulus          | <i>Convolvulus arvensis</i> L.                       | Convolvulaceae | 1.6         |
| Melon                | <i>Citrullus</i> spp.                                | Cucurbitaceae  | 0.7         |
| Fumitory             | <i>Fumaria</i> spp.                                  | Fumariaceae    | 0.3         |
| Erodium              | <i>Erodium</i> spp.                                  | Geraniaceae    | 0.6         |
| Geranium             | <i>Geranium</i> spp.                                 | Geraniaceae    | 0.1         |
| Toad rush            | <i>Juncus bufonius</i> L.                            | Juncaceae      | 4.4         |

| Common name               | Genus species                                                                | Family         | % of fields |
|---------------------------|------------------------------------------------------------------------------|----------------|-------------|
| Horehound                 | <i>Marrubium vulgare</i> L.                                                  | Lamiaceae      | 0.1         |
| Loosestrife, Lesser       | <i>Lythrum hyssopifolia</i> L.                                               | Lythraceae     | 1.9         |
| Mallow, Small<br>flowered | <i>Malva parviflora</i> L.                                                   | Malvaceae      | 4.7         |
| Poppy, Opium              | <i>Papaver somniferum</i> L.                                                 | Paperveraceae} | 1.5         |
| Poppy, Rough              | <i>Papaver hybridum</i> L. ssp. <i>setigerum</i> (DC.) Thell.                | Paperveraceae} |             |
| Plantain                  | <i>Plantago lanceolata</i> L.                                                | Plantaginaceae | 0.2         |
| Phalaris                  | <i>Phalaris</i> spp.                                                         | Poaceae        | 5.0         |
| Annual ryegrass           | <i>Lolium rigidum</i> Gaudin.                                                | Poaceae        | 68.5        |
| Barley grass              | <i>Hordeum glaucum</i> Steud.                                                | Poaceae }      | 17.0        |
| Barley grass              | <i>Hordeum leporinum</i> Link                                                | Poaceae }      |             |
| Barnyard grass            | <i>Echinochloa</i> spp.                                                      | Poaceae        | 0.9         |
| Brome grass               | <i>Bromus diandrus</i> Roth                                                  | Poaceae        | 13.0        |
| Couch                     | <i>Cynodon dactylon</i> (L.) Pers.                                           | Poaceae        | 0.3         |
| Hairy panic               | <i>Panicum effusum</i> R.Br                                                  | Poaceae        | 1.1         |
| Silver grass              | <i>Vulpia</i> spp.                                                           | Poaceae        | 11.3        |
| Soft brome                | <i>Bromus hordeaceus</i> L.                                                  | Poaceae        | 2.3         |
| Spear grass               | <i>Stipa</i> spp.                                                            | Poaceae        | 0.2         |
| Wild oats                 | <i>Avena fatua</i> L.                                                        | Poaceae }      |             |
| Wild oats                 | <i>Avena sterilis</i> subsp. <i>ludoviciana</i> (Durieu)<br>M.Gillet & Magne | Poaceae }      | 59.9        |
| Windmill grass            | <i>Chloris</i> spp.                                                          | Poaceae        | 3.2         |
| Dock                      | <i>Rumex</i> spp.                                                            | Polygonaceae   | 0.3         |
| Sorrel, sheep             | <i>Acetosella vulgaris</i> Fourr. S. lat.                                    | Polygonaceae   | 0.3         |
| Spiny Emex                | <i>Emex australis</i> Steinh.                                                | Polygonaceae   | 0.5         |
| Wireweed                  | <i>Polygonum aviculare</i> L.                                                | Polygonaceae   | 15.4        |
| Nightshade spp            | <i>Solanum</i> spp.                                                          | Solanaceae     | 2.3         |
| Caltrop                   | <i>Tribulus terrestris</i> L.                                                | Zygophyllaceae | 0.3         |
